# Supplementary material for: Enhancement of upconversion, temperature sensing and cathodoluminescence in the K+/Na+ compensated CaMoO4:Er3+/Yb3+ nanophosphor
Source: Royal Society of Chemistry journal article supplement (doi:10.1039/c7nj00086c), 2017-01-01
Supplement: c7nj00086c1.pdf [file c7nj00086c1.pdf]

## Enhancement of upconversion, temperature sensing and cathodoluminescence in $K^+/Na^+$ compensated $CaMoO_4: Er^{3+}/Yb^{3+}$ nanophosphor

Shriya Sinha<sup>1</sup>, Manoj Kumar Mahata<sup>1,2</sup>, H. C. Swart<sup>3</sup>, Ashwini Kumar<sup>3</sup>, Kaushal Kumar<sup>1,\*</sup>

<sup>1</sup>Optical Materials & Bio-imaging Research Laboratory, Department of Applied Physics, Indian Institute of Technology (Indian School of Mines) Dhanbad-826004, India

<sup>2</sup>Second Institute of Physics, University of Göttingen, Friedrich-Hund-Platz 1, 37077 Göttingen, Germany

<sup>3</sup>Physics Department, University of Free State, Bloemfontein, South Africa

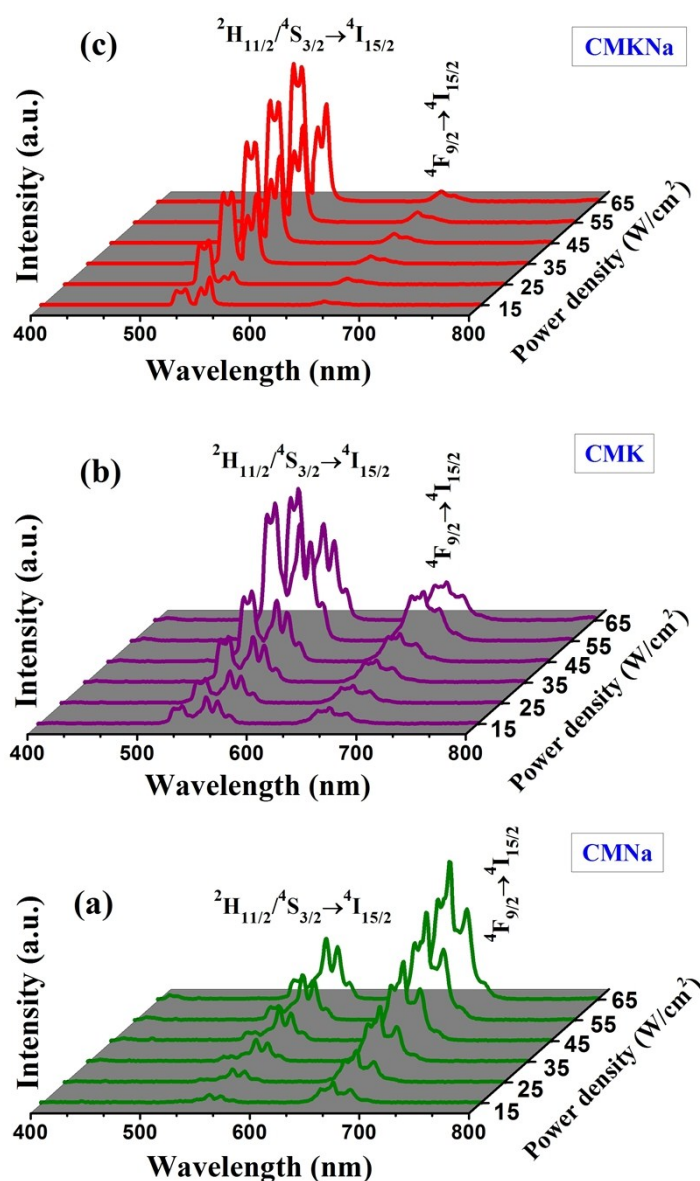

**Supplementary Fig. 1.** Variation of UC emission intensity with different pump power for (a) CMNa (b) CMK (c) CMKNa samples.

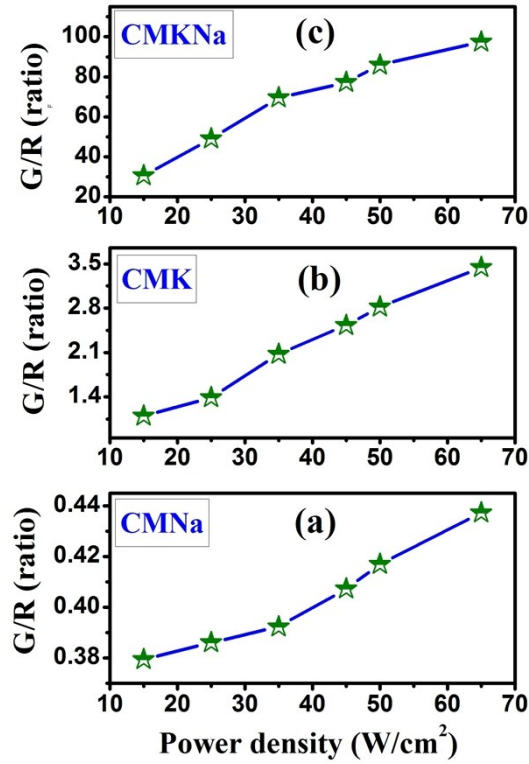

**Supplementary Fig.2.** Variation of G/R ratio with pump power for (a) CMNa (b) CMK (c) CMKNa samples.

**Supplementary Table.1** The calculated CIE chromaticity coordinates (x,y) of CMNa, CMK and CMKNa samples with different power density.

| Power density        | CMNa          | CMK           | CMKNa         |
|----------------------|---------------|---------------|---------------|
|                      | (x , y)       | (x , y)       | (x , y)       |
| 15 W/cm <sup>2</sup> | (0.43 , 0.51) | (0.35 , 0.62) | (0.21 , 0.74) |
| 25 W/cm <sup>2</sup> | (0.43 , 0.53) | (0.33 , 0.64) | (0.19 , 0.76) |
| 35 W/cm <sup>2</sup> | (0.43 , 0.55) | (0.31 , 0.66) | (0.17 , 0.78) |
| 45 W/cm <sup>2</sup> | (0.42 , 0.57) | (0.29 , 0.68) | (0.15 , 0.80) |
| 65 W/cm <sup>2</sup> | (0.41 , 0.58) | (0.27 , 0.70) | (0.14 , 0.81) |
